# Supplementary material for: Functional Conservation and Divergence of Five AP1/FUL-like Genes in Marigold (Tagetes erecta L.)
Source: MDPI journal article supplement (doi:10.3390/genes12122011), 2021-12-17
Supplement: s1 [file s1]

**Table S1.** Sequences of primers.

| Primer                    | Sequence (5'-3')                       | Remarks                  |
|---------------------------|----------------------------------------|--------------------------|
| <i>TeAPI-1</i> -full-F    | TCTCACCTGCCACCAAACCTA                  | Full-length gene cloning |
| <i>TeAPI-1</i> -full-R    | TCACCGGCTTGTCGATCAGT                   | Full-length gene cloning |
| <i>TeAPI-2</i> -full-F    | ACTCAACCCACCTCACCTACACA                | Full-length gene cloning |
| <i>TeAPI-2</i> -full-R    | GGCTCACTAGATCATTTTACGAAGG              | Full-length gene cloning |
| <i>TeFUL1</i> -full-F     | CGGAGATAGAAATGGGACGG                   | Full-length gene cloning |
| <i>TeFUL1</i> -full-R     | ATACTACGGTGTCCAAACGT                   | Full-length gene cloning |
| <i>TeFUL2</i> -full-F     | TAAGATGGGAAGAGGCAGAGTG                 | Full-length gene cloning |
| <i>TeFUL2</i> -full-R     | GGCCTTCGGATTTTACTGGTTA                 | Full-length gene cloning |
| <i>TeFUL3</i> -full-F     | TAAGCGGTGGTTGTTTCCGG                   | Full-length gene cloning |
| <i>TeFUL3</i> -full-R     | CCGGCCGATAAAATTACATGCACAT              | Full-length gene cloning |
| RT- <i>ACT</i> -F         | GGGAAATGAATGCCAAAGCCAAG                | QRT-PCR, Semi-PCR        |
| RT- <i>ACT</i> -R         | AAGACTTCACAACCACTCTCCAAT               | QRT-PCR, Semi-PCR        |
| qRT- <i>TeAPI-1</i> -F    | GACACCGATACAACCTTCCTCA                 | QRT-PCR, Semi-PCR        |
| qRT- <i>TeAPI-1</i> -R    | CATCACCTCCTTCGCCGCTA                   | QRT-PCR, Semi-PCR        |
| qRT- <i>TeAPI-2</i> -F    | ATGCTGGCGGTGGTGGTGAA                   | QRT-PCR, Semi-PCR        |
| qRT- <i>TeAPI-2</i> -R    | TCATTTTACGAAGGAAAGCACC                 | QRT-PCR, Semi-PCR        |
| qRT- <i>TeFUL1</i> -F     | AGGAGAAAGAGTTAGAACAACAGGC              | QRT-PCR, Semi-PCR        |
| qRT- <i>TeFUL1</i> -R     | GGTTGACCTTCTCTTGGGTTCTC                | QRT-PCR, Semi-PCR        |
| qRT- <i>TeFUL2</i> -F     | CCAGCAGTGGACCATTCATTG                  | QRT-PCR                  |
| qRT- <i>TeFUL2</i> -R     | GCGGCAGATACATTATGAGTTTGAG              | QRT-PCR                  |
| qRT- <i>TeFUL3</i> -F     | CTTATGGACCAGCACTCACAT                  | QRT-PCR, Semi-PCR        |
| qRT- <i>TeFUL3</i> -R     | GCATTTCTTCTGTTTCTCCGTTAC               | QRT-PCR, Semi-PCR        |
| RT- <i>TeFUL2</i> -F      | ATAAGGCACTATGCTGGGAAGA                 | Semi-PCR                 |
| RT- <i>TeFUL2</i> -R      | GCGGATCATCCATAGCGGAA                   | Semi-PCR                 |
| AD-F                      | CTATTCGATGATGAAGATACCCCAACCAACCC       | Yeast two-hybrid         |
| AD-R                      | GTGAACTTGCGGGGTTTTTCAGTATCTACGATT      | Yeast two-hybrid         |
| BD-F                      | TCATCGGAAGAGAGTAG                      | Yeast two-hybrid         |
| BD-R                      | GAGTCACTTTAAATTTGTAT                   | Yeast two-hybrid         |
| AD/BD- <i>TeAPI-1</i> -F  | <b>CATATGATGGGTAGAGGTAAGGTACA</b>      | Yeast two-hybrid         |
| AD/BD- <i>TeAPI-1</i> -R  | <b>GAATTCTTATGAAGGAAAACACCTCA</b>      | Yeast two-hybrid         |
| AD/BD- <i>TeAPI-2</i> -F  | <b>CATATGATGGGTAGAGGTAAGGTACA</b>      | Yeast two-hybrid         |
| AD/BD- <i>TAPI-2</i> -R   | <b>GAATTCTTACGAAGGAAAGCACCTCA</b>      | Yeast two-hybrid         |
| AD/BD- <i>TeFUL1</i> -F   | <b>CATATGATGGGAAGAGGAAGAGTAACATTGA</b> | Yeast two-hybrid         |
| AD/BD- <i>TeFUL1</i> -R   | <b>GAATTCTTATATAATATGATCTACTGGCCGG</b> | Yeast two-hybrid         |
| AD/BD- <i>TeFUL2</i> -F   | <b>CATATGATGGGAAGAGGCAGAGTGC</b>       | Yeast two-hybrid         |
| AD/BD- <i>TeFUL2</i> -R   | <b>GAATTCTTACTGGTTAATGTGGCGGA</b>      | Yeast two-hybrid         |
| AD/BD- <i>TeFUL3</i> -F   | <b>CATATGATGGGAAGAGGAAGAGTAACATTGA</b> | Yeast two-hybrid         |
| AD/BD- <i>TeFUL3</i> -R   | <b>GAATTCTTATATAATATGATCTACTGGCCGG</b> | Yeast two-hybrid         |
| AD/BD- <i>TeSEP1</i> -F   | <b>CATATGATGGGTAGAGGAAGAGTTGAATTGA</b> | Yeast two-hybrid         |
| AD/BD- <i>TeSEP1</i> -R   | <b>GGATCCTCAAAGCATCCATCCAGGGA</b>      | Yeast two-hybrid         |
| AD/BD- <i>TeSEP3-1</i> -F | <b>CATATGATGGGAAAAGGAAGGTTAGAGTTGA</b> | Yeast two-hybrid         |
| AD/BD- <i>TeSEP3-1</i> -R | <b>GGATCCTCATGCTGGCCAACCCTG</b>        | Yeast two-hybrid         |

|                          |                                         |                           |
|--------------------------|-----------------------------------------|---------------------------|
| AD/BD- <i>TeSEP3-2-F</i> | <b>CATATG</b> ATGGGAAGAGGAAGAGTAGAG     | Yeast two-hybrid          |
| AD/BD- <i>TeSEP3-2-R</i> | <b>GAATTCT</b> TAAACATGGCATCCATCCTT     | Yeast two-hybrid          |
| AD/BD- <i>TeSEP3-3-F</i> | <b>CATATG</b> ATGGGGAGAGGAAGA           | Yeast two-hybrid          |
| AD/BD- <i>TeSEP3-3-R</i> | <b>GAATTCT</b> CACTGAAACCATATTGACATGTAA | Yeast two-hybrid          |
| AD/BD- <i>TeSEP4-F</i>   | <b>CATATG</b> ATGGGAAGAGGCAGAGTTGAAC    | Yeast two-hybrid          |
| AD/BD- <i>TeSEP4-R</i>   | <b>GGATCC</b> CTTATTTCTTAAGGCTTTATTTGTT | Yeast two-hybrid          |
| AD/BD- <i>TeAGL6-F</i>   | <b>CATATG</b> ATGGGGAGAGGACGAGTCG       | Yeast two-hybrid          |
| AD/BD- <i>TeAGL6-R</i>   | <b>GGATCC</b> TCAAAGATTAACCCATCCATGGATA | Yeast two-hybrid          |
| 35S- <i>TeAPI-1-F</i>    | <b>GGTACC</b> ATGGGTAGAGGTAAGGTACA      | Ectopic expression vector |
| 35S- <i>TeAPI-1-R</i>    | <b>GGATCC</b> TATGAAGGAAAACACCTCA       | Ectopic expression vector |
| 35S- <i>TeAPI-2-F</i>    | <b>GGTACC</b> ATGGGTAGAGGTAAGGTACA      | Ectopic expression vector |
| 35S- <i>TeAPI-2-R</i>    | <b>GTCGAC</b> TTACGAAGGAAAGCACCTCA      | Ectopic expression vector |
| 35S- <i>TeFUL1-F</i>     | <b>CCCGGG</b> ATGGGACGGGAAAAGGTAAC      | Ectopic expression vector |
| 35S- <i>TeFUL1-R</i>     | <b>TCTAGAT</b> TACTTGCTAATGTGTTGAAG     | Ectopic expression vector |
| 35S- <i>TeFUL2-F</i>     | <b>GGTACC</b> ATGGGAAGAGGCAGAGTGC       | Ectopic expression vector |
| 35S- <i>TeFUL2-R</i>     | <b>GTCGAC</b> TTACTGGTTAATGTGGCGGA      | Ectopic expression vector |
| 35S- <i>TeFUL3-F</i>     | <b>GGTACC</b> ATGGGAAGAGGAAGAGTAACATTGA | Ectopic expression vector |
| 35S- <i>TeFUL3-R</i>     | <b>GTCGAC</b> TTATATAATATGATCTACTGGCCGG | Ectopic expression vector |
| qRT- <i>FT-F</i>         | TATCCCTGCTACAACCTGGAACAACC              | QRT-PCR                   |
| qRT- <i>FT-R</i>         | GCCTGCCAAGCTGTCTGAAACAATAT              | QRT-PCR                   |
| qRT- <i>LFY-F</i>        | TACTCTCCGCCGCTGGTGATTC                  | QRT-PCR                   |
| qRT- <i>LFY-R</i>        | ACTTCCTCCTCCGCCGTTATTCC                 | QRT-PCR                   |
| qRT- <i>SCO1-F</i>       | TGAAAGCGAAGTTTGGTCAAATAAGA              | QRT-PCR                   |
| qRT- <i>SCO1-R</i>       | TCTTGAAGAACAAGGTAACCCAATGA              | QRT-PCR                   |
| qRT- <i>SEP3-F</i>       | GTATCAGGGGCAACAAGATGGAAT                | QRT-PCR                   |
| qRT- <i>SEP3-R</i>       | AAAGAGAGGGATTGATTAAGTGAGAAAGA           | QRT-PCR                   |
| qRT- <i>API-F</i>        | AAATCCAGCATCCTTACATGCTCTC               | QRT-PCR                   |
| qRT- <i>API-R</i>        | CAGTTCGAGATCATTCCTCCTCATT               | QRT-PCR                   |
| qRT- <i>SPL9-F</i>       | CAAGGTTTCAGTTGGTGGAGGA                  | QRT-PCR                   |
| qRT- <i>SPL9-R</i>       | TGAAGAAGCTCGCCATGTATTG                  | QRT-PCR                   |
| qRT- <i>SVP-F</i>        | GAAGGACAGTCGTCGGAGTC                    | QRT-PCR                   |
| qRT- <i>SVP-R</i>        | GCCTCTTCCATAGGCAGAAA                    | QRT-PCR                   |
| qRT- <i>TFL1-F</i>       | GCACAACAGATGCTACGTTTGCC                 | QRT-PCR                   |
| qRT- <i>TFL1-R</i>       | CCTATGCTTGGCCTTGGCAATTC                 | QRT-PCR                   |
| qRT- <i>AGL24-F</i>      | GAAGGCTTTGGAGACAGAGTCGGTGA              | QRT-PCR                   |
| qRT- <i>AGL24-R</i>      | AGATGGAAGCCCAAGCTTCAGGGAA               | QRT-PCR                   |

Note: bold font is the sequence of enzyme cutting site. *TeAG1* (Acc. No. MT452648) and *TeAG2* (Acc. No. MT452649) are class C genes; *TeAGL11-1* (Acc. No. MT394168) and *TeAGL11-2* (Acc. No. MT394169) are class D genes; *TeSEP1* (Acc. No. MT394175), *TeSEP3-1* (Acc. No. MT394176), *TeSEP3-2* (Acc. No. MT394177), *TeSEP3-3* (Acc. No. MT394178), *TeSEP4* (Acc. No. MT394179) are class E genes. *TeAGL6* (Acc. No. MT394180) is *AGL6*-like gene.

**Table S2.** Sequence information of AP1/FUL-like proteins used to construct evolutionary tree.

| No. | Protein Name | Accession No. | Species                         | Plant Lineage    |
|-----|--------------|---------------|---------------------------------|------------------|
| 1   | TeAP1-1      | MT394170      | <i>Tagetes erecta</i>           | Asteraceae       |
| 2   | TeAP1-2      | MT394171      | <i>Tagetes erecta</i>           | Asteraceae       |
| 3   | TeFUL1       | MT394172      | <i>Tagetes erecta</i>           | Asteraceae       |
| 4   | TeFUL2       | MT394173      | <i>Tagetes erecta</i>           | Asteraceae       |
| 5   | TeFUL3       | MT394174      | <i>Tagetes erecta</i>           | Asteraceae       |
| 6   | HaFUL        | XP_021983861  | <i>Helianthus annuus</i>        | Asteraceae       |
| 7   | HAM75        | AF462152      | <i>Helianthus annuus</i>        | Asteraceae       |
| 8   | HAM92        | AY173071      | <i>Helianthus annuus</i>        | Asteraceae       |
| 9   | CDM8         | AAO22981      | <i>Chrysanthemum morifolium</i> | Asteraceae       |
| 10  | CDM41        | AAO22980      | <i>Chrysanthemum morifolium</i> | Asteraceae       |
| 11  | CDM111       | AAO22979      | <i>Chrysanthemum morifolium</i> | Asteraceae       |
| 12  | GSQUA1       | CAA08805      | <i>Gerbera hybrida</i>          | Asteraceae       |
| 13  | GSQUA2       | CAX65661      | <i>Gerbera hybrida</i>          | Asteraceae       |
| 14  | GSQUA3       | CAX65662      | <i>Gerbera hybrida</i>          | Asteraceae       |
| 15  | GSQUA5       | CAX65663      | <i>Gerbera hybrida</i>          | Asteraceae       |
| 16  | GSQUA6       | CAX65664      | <i>Gerbera hybrida</i>          | Asteraceae       |
| 17  | EuFUL        | XP_022016988  | <i>Antirrhinum majus</i>        | Scrophulariaceae |
| 18  | DEFH28       | AY040247      | <i>Antirrhinum majus</i>        | Scrophulariaceae |
| 19  | SQUA         | X63701        | <i>Antirrhinum majus</i>        | Scrophulariaceae |
| 20  | AP1          | NP_177074     | <i>Arabidopsis thaliana</i>     | Brassicaceae     |
| 21  | CAL          | NM_102395     | <i>Arabidopsis thaliana</i>     | Brassicaceae     |
| 22  | FUL          | NP_568929     | <i>Arabidopsis thaliana</i>     | Brassicaceae     |
| 23  | PFG          | AF176782      | <i>Petunia hybrida</i>          | Solanaceae       |
| 24  | FBP26        | AF176783      | <i>Petunia hybrida</i>          | Solanaceae       |
| 25  | FBP29        | AF335245      | <i>Petunia hybrida</i>          | Solanaceae       |
| 26  | PhFUL        | AY306172      | <i>Petunia hybrida</i>          | Solanaceae       |
| 27  | CanMADS6     | AF130118      | <i>capsicum annuum</i>          | Solanaceae       |
| 28  | DcMADS1      | AJ271147      | <i>Daucus carota</i>            | Apiaceae         |
| 29  | OsMADS14     | AF058697      | <i>Oryza sativa</i>             | Poaceae          |
| 30  | OsMADS15     | AF058698      | <i>Oryza sativa</i>             | Poaceae          |
| 32  | ZAP1         | L46400        | <i>Zea mays</i>                 | Poaceae          |
| 33  | TrmAP1       | AY188331      | <i>Triticum monococcum</i>      | Poaceae          |
| 34  | ORAP1-2      | DQ104327      | <i>Phalaenopsis amabilis</i>    | Orchidaceae      |
| 35  | DthyrFL1     | AY927236      | <i>Dendrobium thyrsiflorum</i>  | Orchidaceae      |
| 36  | AIFL         | AY306138      | <i>Allium sp.</i>               | Liliaceae        |
| 37  | GRCD2        | CAH04878.1    | <i>Gerbera hybrida</i>          | Asteraceae       |
| 38  | GRCD4        | CAX65570.1    | <i>Gerbera hybrida</i>          | Asteraceae       |
| 39  | PhAGL6       | BAA94287.1    | <i>Petunia hybrida</i>          | Solanaceae       |
| 40  | AGL6         | NP_182089.1   | <i>Arabidopsis thaliana</i>     | Brassicaceae     |

**Table S3.** Amino acid sequence alignment of TeAP1/FUL class proteins.

|         | TeAP1-1 | TeAP1-2 | TeFUL1 | TeFUL2 | TeFUL3 |
|---------|---------|---------|--------|--------|--------|
| TeAP1-1 | 100%    | 89.92%  | 51.81% | 49.80% | 51.00% |
| TeAP1-2 | 89.92%  | 100%    | 49.19% | 52.02% | 49.60% |
| AP1     | 59.39%  | 59.14%  | 48.05% | 53.52% | 46.09% |
| CAL     | 55.00%  | 54.86%  | 42.35% | 51.76% | 43.53% |
| TeFUL1  | 51.81%  | 49.19%  | 100%   | 54.04% | 61.16% |
| TeFUL2  | 49.80%  | 52.02%  | 54.04% | 100%   | 50.21% |
| TeFUL3  | 51.00%  | 49.60%  | 61.16% | 50.21  | 100%   |
| FUL     | 54.25%  | 54.44%  | 52.89% | 54.55% | 54.07% |
| AGL79   | 44.84%  | 45.24   | 46.18% | 49.40% | 42.58% |

Note: the proteins AP1, FUL, CAL, and AGL79 are from Arabidopsis. TeAP1-1, TeAP1-2, TeFUL1, TeFUL2, and TeFUL3 were from marigold.

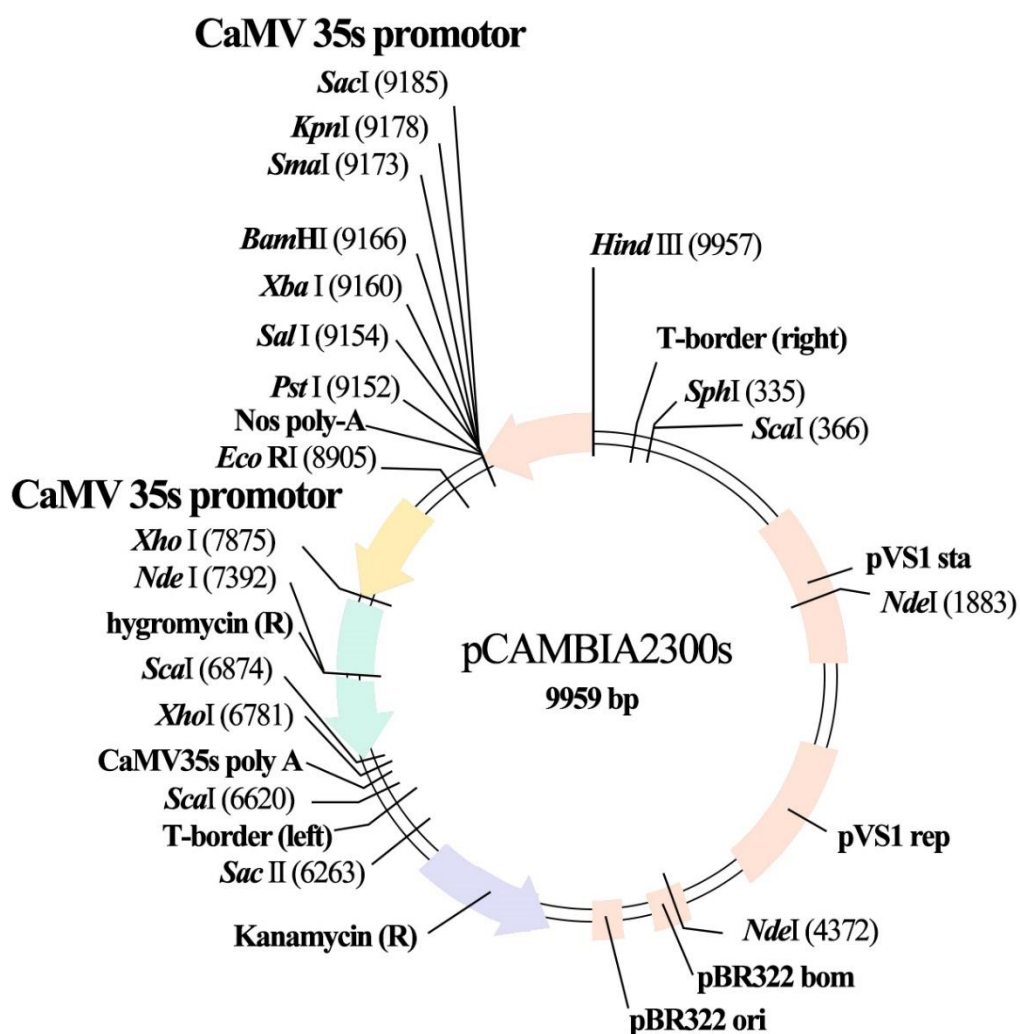

**Figure S1.** The map of pCambia2300s.

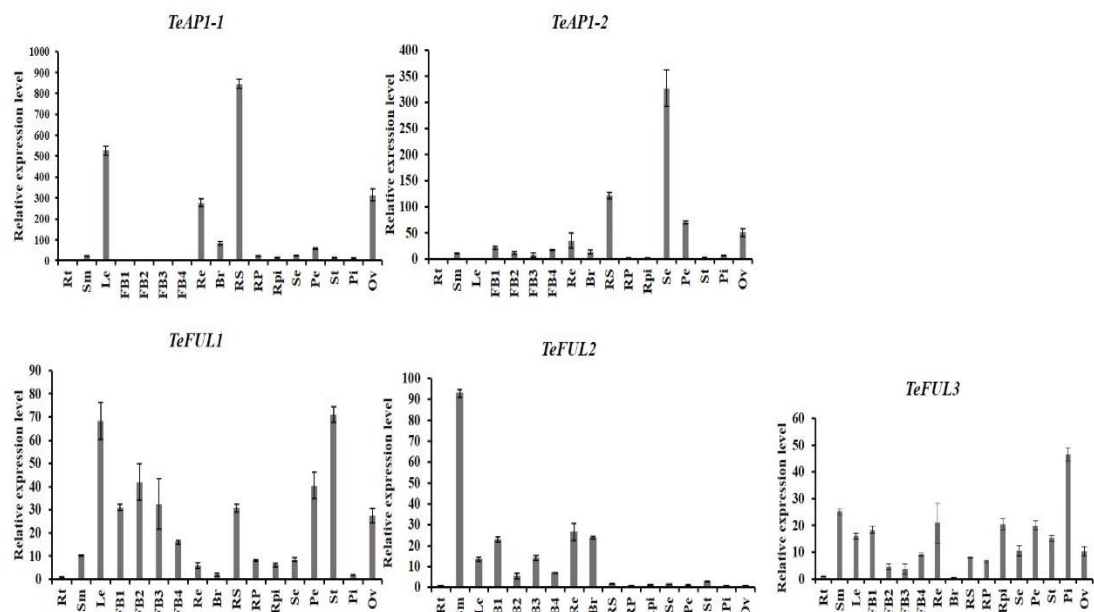

**Figure S2.** Expression levels of *TeAPI/FUL* in different tissues and organs. Rt: root; Sm: stems; Le: leaf; FB1-FB4: flower buds were 0-1mm, 2-3mm, 4-5 mm and 6-7mm in diameter, respectively; Re: receptacle; Br: bract; RS: sepal of ray floret; RP: petal of ray floret; RPi: pistil of ray floret; Se: sepal of disk floret; Pe: petal of disk floret; St: stamen of disk floret; Pi: pistil of disk floret; Ov: ovary.

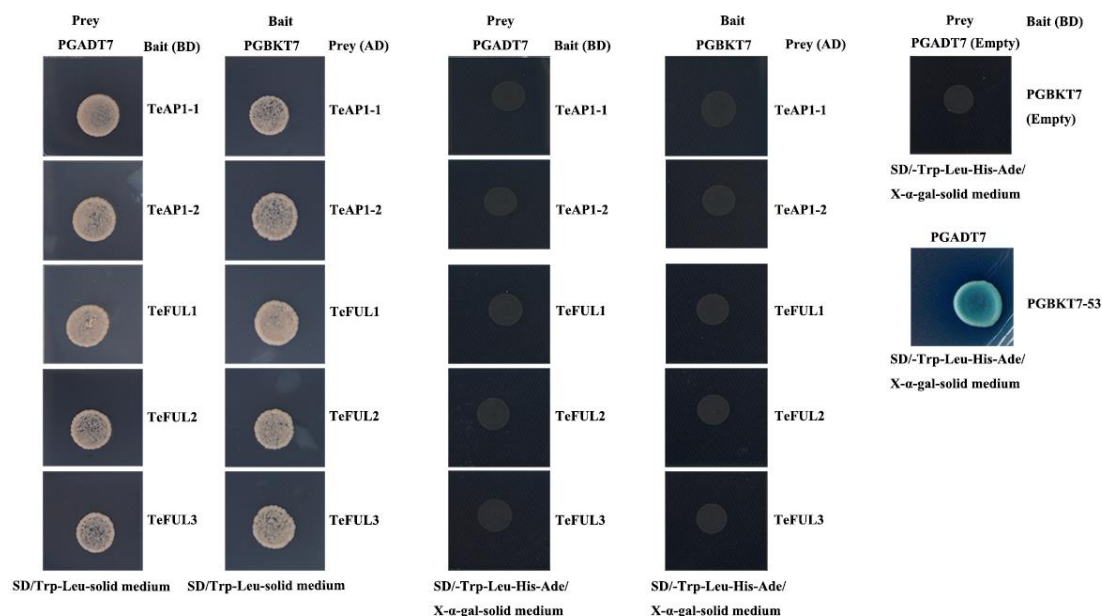

(a)

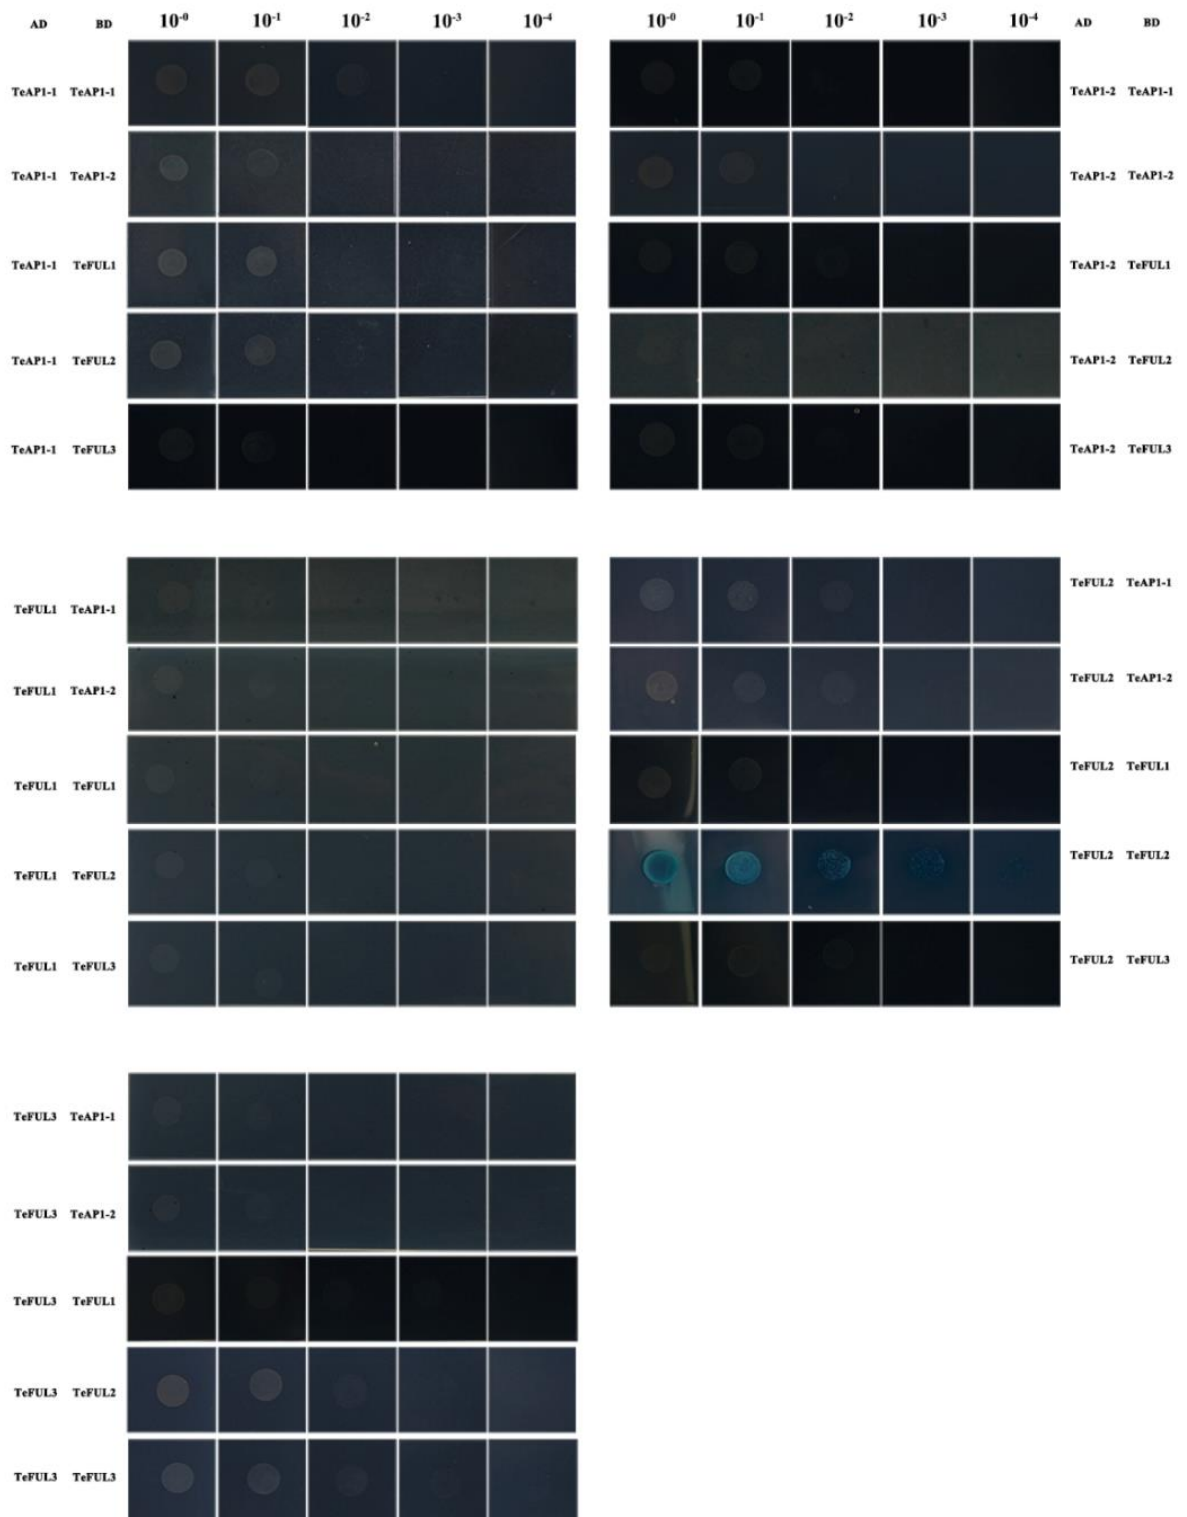

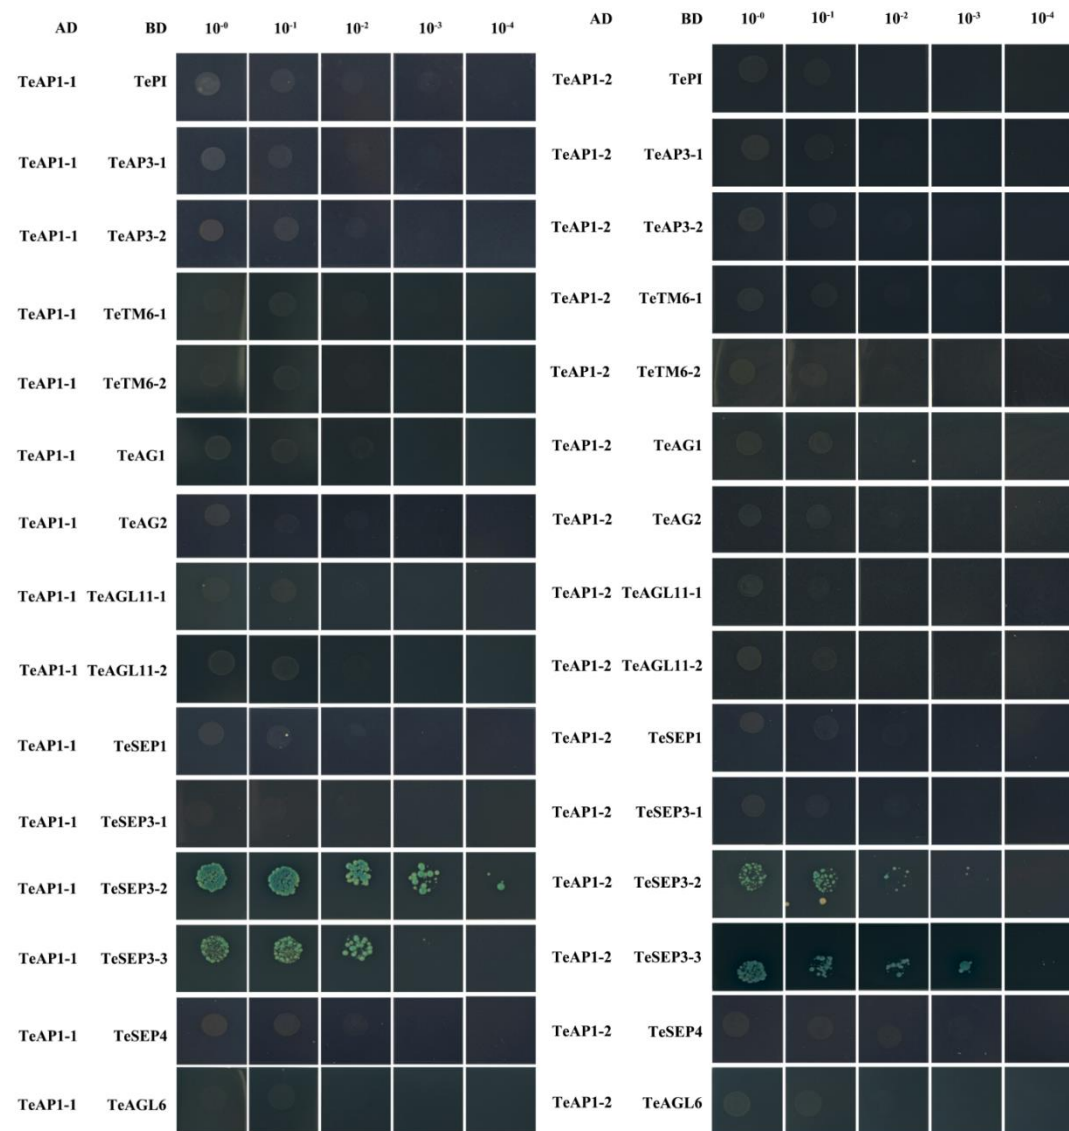

(b)

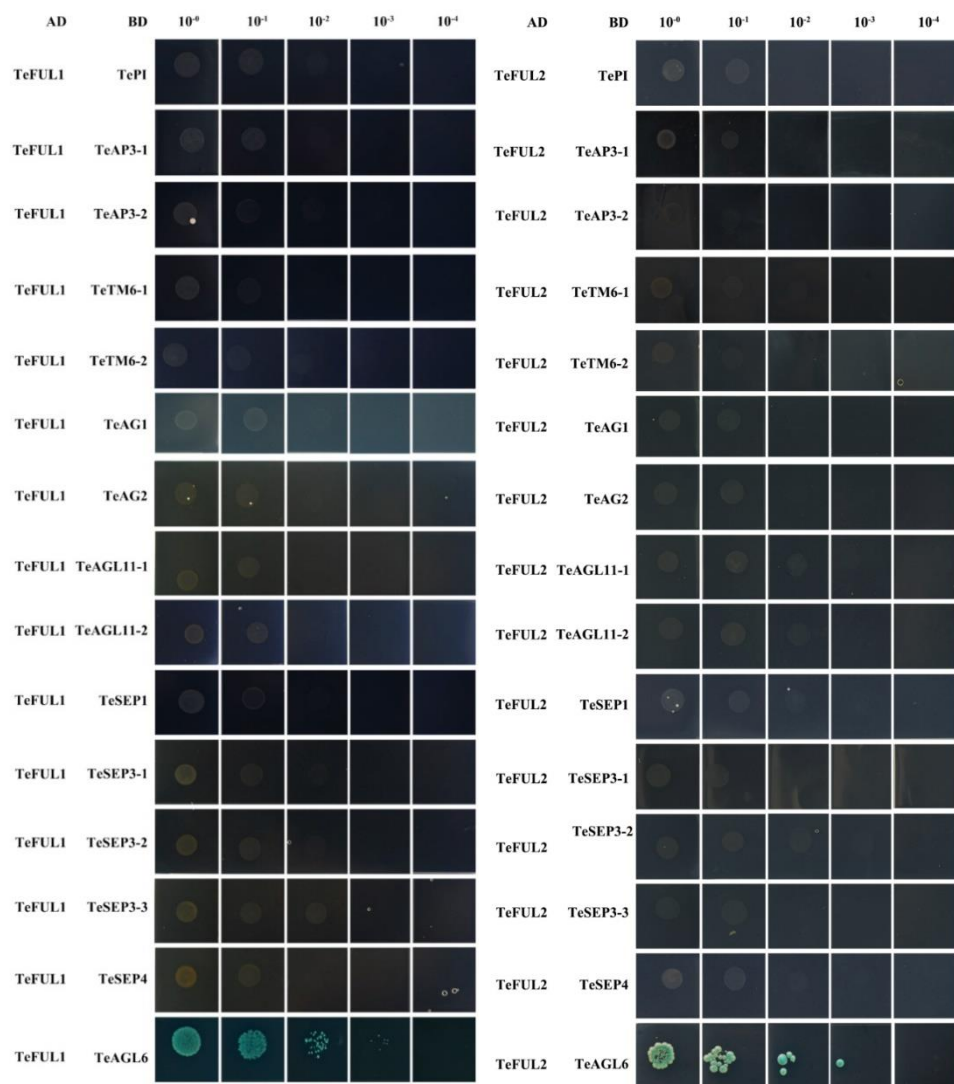

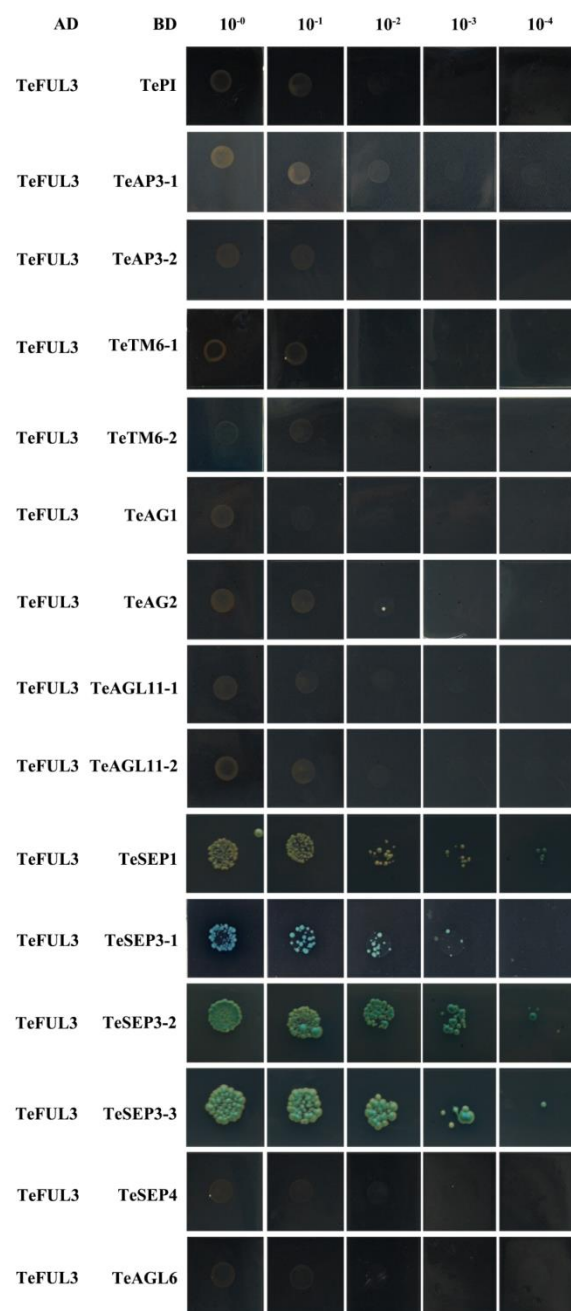

(c)

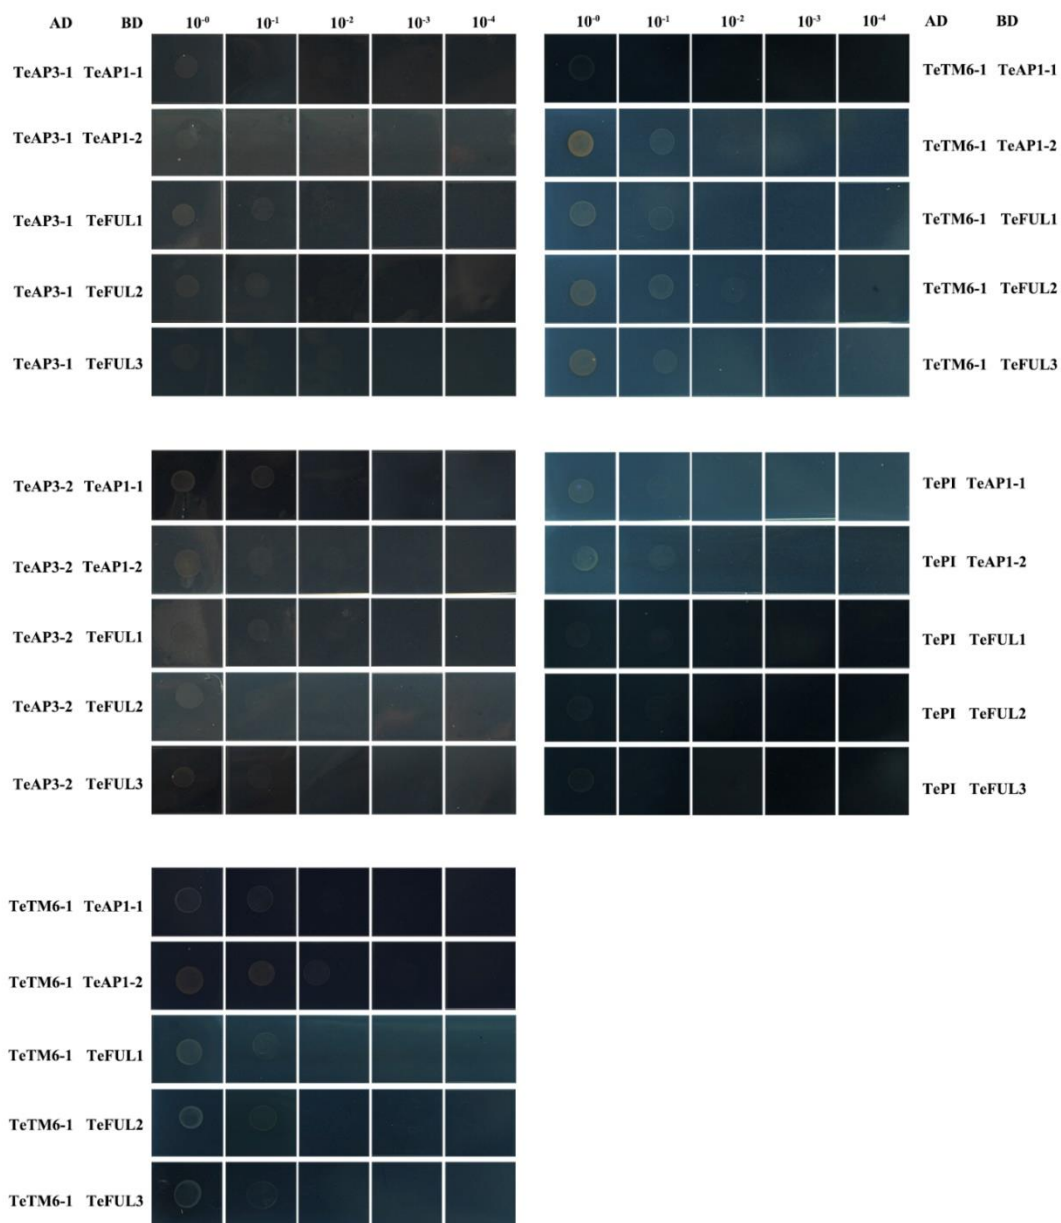

(d)

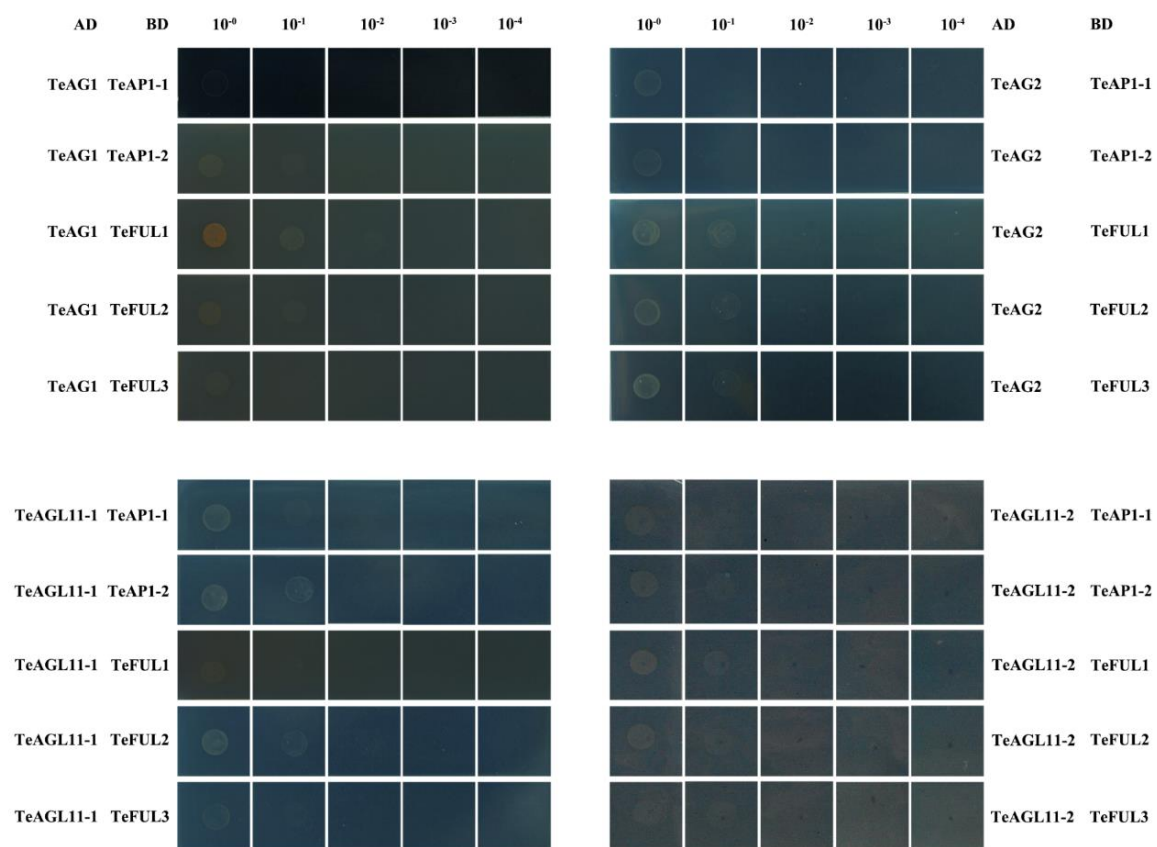

(e)

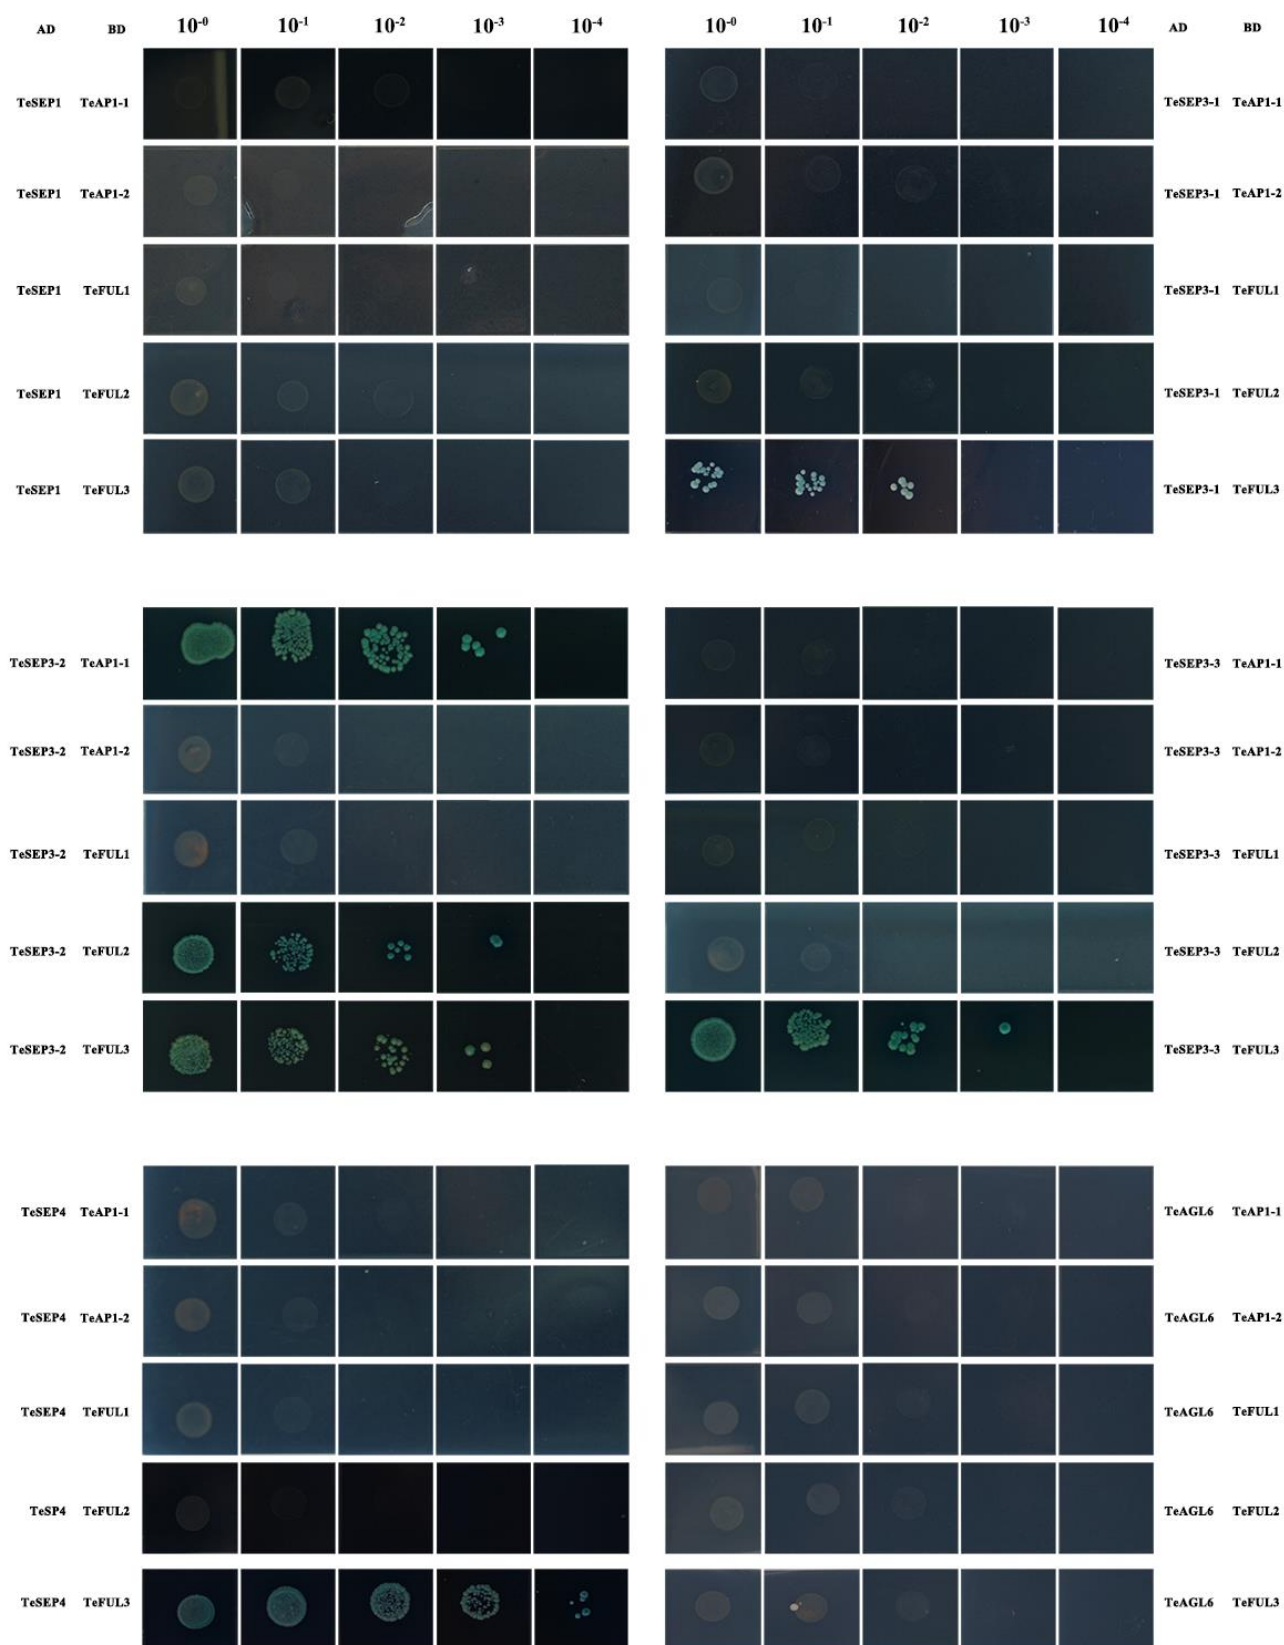

**(f)**

**Figure S3.** Interactions of TeAP1/FUL proteins with class A, B, C, D and, E proteins of marigold by yeast two-hybrid assays. **(a)** Assessing of Self-activation and auto-action of AD and BD constructs. **(b)** Interactions of TeAP1/FUL proteins with class B, C, D, and E proteins

of marigold by yeast two-hybrid assays. Ten-fold serial dilutions from  $10^{-1}$  to  $10^{-5}$  of each culture were spotted on the selected SD -Leu/-Trp/-His/-Ade plates with X- $\alpha$ -gal. **(c)** Interactions of TeAP1/FUL with class A, B, C, D, and E proteins of marigold by yeast two-hybrid assays. Ten-fold serial dilutions from  $10^{-1}$  to  $10^{-5}$  of each culture were spotted on the selected SD -Leu/-Trp/-His/-Ade plates with X- $\alpha$ -gal. Class B proteins: TeAP3-1, TeAP3-2, TePI, TeTM6-1, TeTM6-2. Class C proteins: TeAG1 and TeAG2 proteins; Class D proteins: TeAGL11-1 and TeAGL11-2; Class E proteins: TeSEP1, TeSEP3-1, TeSEP3-2, TeSEP3-3, TeSEP4 and TeAGL6 proteins. **(d)** Interactions of class B proteins and TeAP1/FUL proteins of marigold by yeast two-hybrid assays. Ten-fold serial dilutions from  $10^{-1}$  to  $10^{-5}$  of each culture were spotted on the selected SD -Leu/-Trp/-His/-Ade plates with X- $\alpha$ -gal. Class B proteins: TeAP3-1, TeAP3-2, TePI, TeTM6-1, TeTM6-2. **(e)** Interactions of class C and D proteins with TeAP1/FUL proteins of marigold by yeast two-hybrid assays. Ten-fold serial dilutions from  $10^{-1}$  to  $10^{-5}$  of each culture were spotted on the selected SD -Leu/-Trp/-His/-Ade plates with X- $\alpha$ -gal. Class C proteins: TeAG1 and TeAG2 proteins; Class D proteins: TeAGL11-1 and TeAGL11-2. **(f)** Interactions of class E proteins and TeAP1/FUL proteins of marigold by yeast two-hybrid assays. Ten-fold serial dilutions from  $10^{-1}$  to  $10^{-5}$  of each culture were spotted on the selected SD -Leu/-Trp/-His/-Ade plates with X- $\alpha$ -gal. Class D proteins: Class E proteins: TeSEP1, TeSEP3-1, TeSEP3-2, TeSEP3-3, TeSEP4 and TeAGL6 proteins.

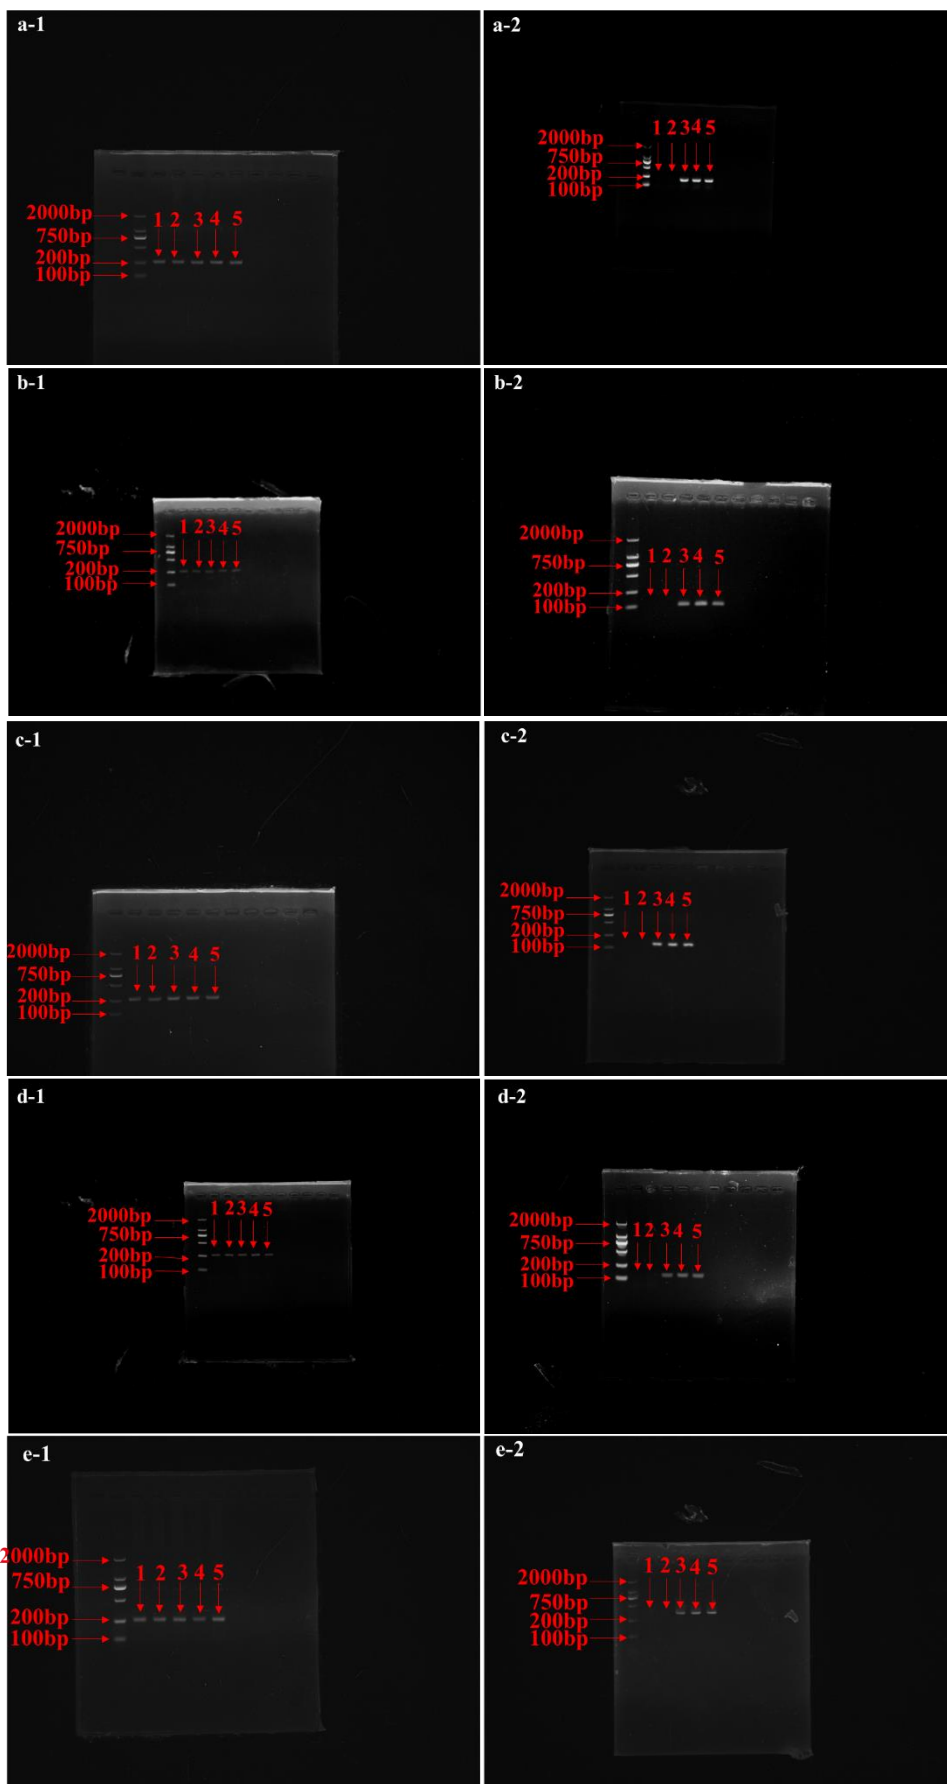

**f**

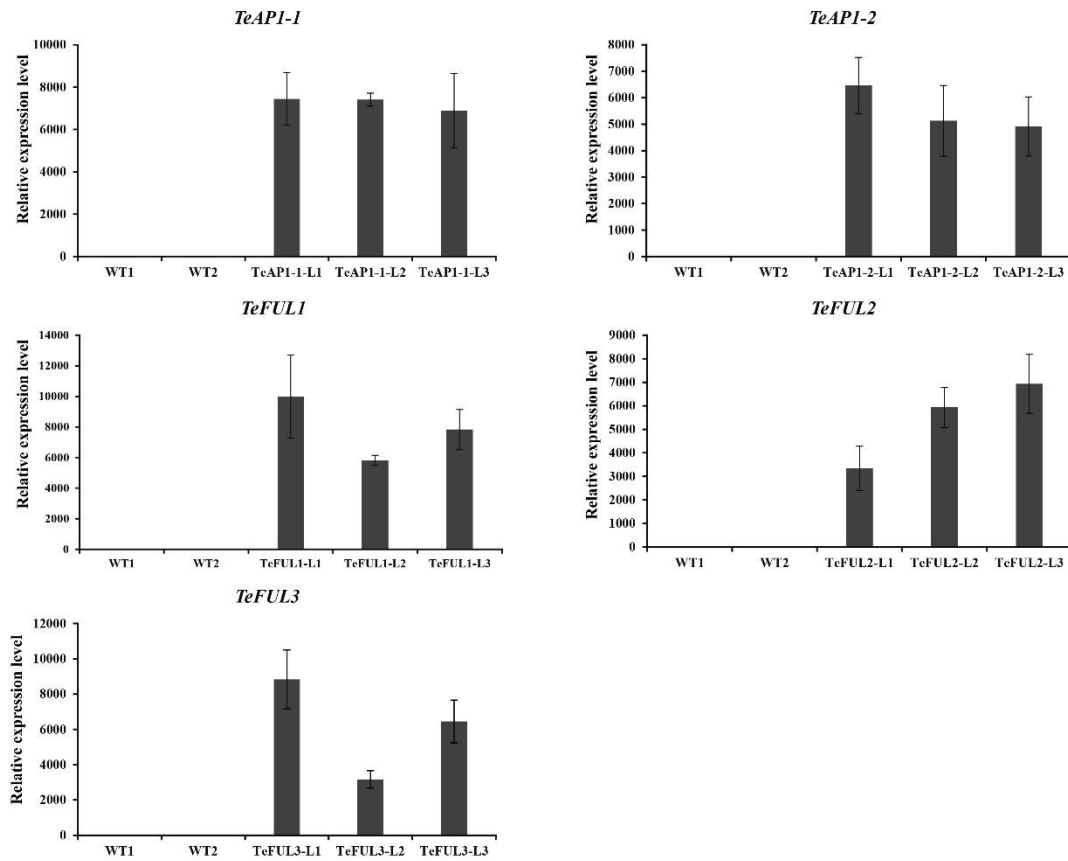

**Figure S4.** Expression of *TeAPI-1*, *TeAPI-2*, *TeFUL1*, *TeFUL2* and *TeFUL3* in seedlings of T<sub>1</sub> transgenic plants. (a-e) Expression of *TeAPI-1*, *TeFUL1*, and *TeFUL3* in seedlings of T<sub>1</sub> transgenic lines by semi-quantitative RT-PCR. (a) Semi-qRT-PCR analysis of transgenes in wild-type Arabidopsis and *35S:TeAPI-1* transgenic plants. (a-1) The picture was the constitutive gene is Arabidopsis house-keeping gene *AtEF1a*. (a-2) The picture was the expression level of *TeAPI-1* in transgenic lines, the band size was 180 bp. The number of 1-5 indicate wild-type Arabidopsis plant 1, wild-type Arabidopsis plant 2, *35S:TeAPI-1* transgenic Arabidopsis line 1, *35S:TeAPI-1* transgenic Arabidopsis line 2, and *35S:TeAPI-1* transgenic Arabidopsis line 3, respectively. (b) Semi-qRT-PCR analysis of transgenes in wild-type Arabidopsis and *35S:TeAPI-2* transgenic plants. (b-1) The picture was the constitutive gene is Arabidopsis house-keeping gene *AtEF1a*. (b-2) The picture was the expression level of *TeAPI-2* in transgenic lines, the band size was 106 bp. The number of 1-5 indicate wild-type Arabidopsis plant 1, wild-type Arabidopsis plant 2, *35S:TeAPI-2* transgenic Arabidopsis line 1, *35S:TeAPI-2* transgenic Arabidopsis line 2, and *35S:TeAPI-1* transgenic Arabidopsis line 3, respectively. (c) Semi-qRT-PCR analysis of transgenes in wild-type Arabidopsis and *35S:TeFUL1* transgenic plants. (c-1) The picture was the constitutive gene is Arabidopsis house-keeping gene *AtEF1a*. (c-2) The picture was the expression level of *TeFUL1* in transgenic lines, the band size was 139 bp. The number of 1-5 indicate wild-type Arabidopsis plant 1, wild-type Arabidopsis plant 2, *35S:TeFUL1* transgenic Arabidopsis line 1, *35S:TeFUL1* transgenic Arabidopsis line 2, and *35S:TeFUL1* transgenic Arabidopsis line 3, respectively. (d) Semi-qRT-PCR analysis of transgenes in wild-type Arabidopsis and *35S:FUL2* transgenic plants. (d-1) The picture was the constitutive gene is Arabidopsis house-keeping gene *AtEF1a*. (d-2) The

picture was the expression level of *TeFUL2* in transgenic lines, the band size was 127 bp. The number of 1-5 indicate wild-type Arabidopsis plant 1, wild-type Arabidopsis plant 2, *35S:TeFUL2* transgenic Arabidopsis line 1, *35S:TeFUL2* transgenic Arabidopsis line 2, and *35S:TeFUL2* transgenic Arabidopsis line 3, respectively. (e) Semi-qRT-PCR analysis of transgenes in wild-type Arabidopsis and *35S:FUL3* transgenic plants. (e-1) The picture was the constitutive gene is Arabidopsis house-keeping gene *AtEF1α*. (e-2) The picture was the expression level of *TeFUL3* in transgenic lines, the band size was 377 bp. The number of 1-5 indicate wild-type Arabidopsis plant 1, wild-type Arabidopsis plant 2, *35S:TeFUL3* transgenic Arabidopsis line 1, *35S:TeFUL3* transgenic Arabidopsis line 2, and *35S:TeFUL3* transgenic Arabidopsis line 3, respectively. (f) Expression of *TeAP1-1*, *TeAP1-2*, *TeFUL1*, *TeFUL2* and *TeFUL3* in seedlings of T<sub>1</sub> transgenic lines by quantitative real-time PCR.
